# Supplementary material
Source: publisher figshare collection journal article supplement (https://acs.figshare.com/ndownloader/files/4561414)

# Design and Synthesis of an *ortho*-Hydroxyphenyl-containing Spiropyran Thermochromic Colorant

Jhih-Rong Chen and Ding-Yah Yang\*

*Department of Chemistry, Tunghai University,  
181, Taichung-Kang Road Sec. 3, Taichung, Taiwan 407, ROC*

Email: [yang@thu.edu.tw](mailto:yang@thu.edu.tw)

## Supporting Information

### Table of Content

|                                                                                               |         |
|-----------------------------------------------------------------------------------------------|---------|
| General Experimental                                                                          | S2      |
| Synthetic procedures for compounds <b>1</b> , <b>2</b> , <b>3</b> and <b>6</b>                | S2–S4   |
| X-ray crystal structures of compounds <b>1</b> and <b>6</b>                                   | S5      |
| Variable temperature <sup>1</sup> H NMR experiments of <b>1</b>                               | S5      |
| Reference                                                                                     | S6      |
| Copies of <sup>1</sup> H NMR spectra of compounds <b>1</b> , <b>2</b> , <b>3</b> and <b>6</b> | S7–S10  |
| Copies of <sup>13</sup> C NMR spectra of compounds <b>1</b> , <b>3</b> and <b>6</b>           | S11–S13 |

## General Experimental

Melting points were determined on a Mel-Temp melting point apparatus in open capillaries and are uncorrected. MS were performed with a JEOL JMS-SX/SX 102A spectrometer. Single-crystal structures were determined with a Bruker AXS SMART-1000 X-ray single-crystal diffractometer. Absorption spectra were recorded using a HP8453 spectrophotometer.  $^1\text{H}$  and  $^{13}\text{C}$  NMR spectra were recorded at 300 and 75 MHz on a Varian VXR300 spectrometer. Chemical shifts were reported in parts per million on the  $\delta$  scale relative to an internal standard (tetramethylsilane, or appropriate solvent peaks) with coupling constants given in hertz.  $^1\text{H}$  NMR multiplicity data are denoted by s (singlet), d (doublet), t (triplet), q (quartet), and m (multiplet). Analytical thin-layer chromatography (TLC) was carried out on Merck silica gel 60G-254 plates (25 mm) and developed with the solvents mentioned. Flash chromatography was performed in columns of various diameters with Merck silica gel (230–400 mesh ASTM 9385 kieselgel 60H) by elution with the solvent systems. Solvents, unless otherwise specified, were reagent grade and distilled once prior to use. The commercial chemicals were used as received.

## Synthetic procedures

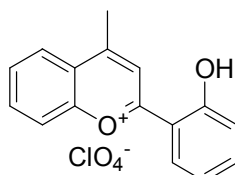

### Preparation of 2'-hydroxy-4-methylflavylium perchlorate (2).

To a solution of 2-hydroxyacetophenone (1 g, 7.4 mmol) in acetic acid (30 mL) was added perchloric acid (15 mL) at room temperature. The mixture was refluxed for 13 h. After cooled to room temperature, the precipitate was filtered. The cake was then washed with ethyl acetate and hexanes and then dried under vacuum to give an orange solid in a 66% yield:  $R_f$  = 0.30 (15% EtOAc/hexanes); mp 230–231 °C (lit<sup>1</sup> 230–231 °C);  $^1\text{H}$  NMR ( $\text{CD}_3\text{OD}$ , 300 MHz) 9.08 (s, 1H), 8.60–8.21 (m, 4H), 7.98 (t,  $J$  = 6.9 Hz, 1H), 7.72 (t,  $J$  = 7.2 Hz, 1H), 7.23–7.12 (m, 2H).

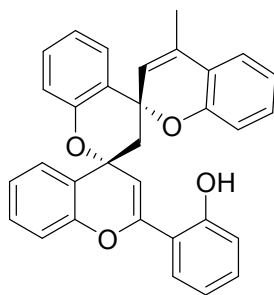

### Preparation of compound 1.

To a solution of **2** (283 mg, 0.6 mmol) in methylene chloride (15 mL) was added triethylamine (303 mg, 1.8 mmol) at room temperature. After the mixture was stirred for 0.5 h. the solution was evaporated under reduced pressure and the crude product was purified by column chromatography (1:12 EtOAc/hexanes) to give a white solid; yield 52%;  $R_f$  = 0.42 (15% EtOAc/hexanes); mp 139–140 °C;  $^1\text{H}$  NMR ( $\text{CDCl}_3$ , 300 MHz)  $\delta$  7.64 (dd,  $J$  = 7.8, 1.5 Hz, 1H), 7.57 (dd,  $J$  = 7.8, 1.5 Hz, 1H), 7.51 (dd,  $J$  = 7.8, 1.5 Hz, 1H), 7.38–7.41 (m, 12H), 6.74 (d,  $J$  = 7.8 Hz, 1H), 6.39 (s, 1H), 5.44 (s, 1H), 2.86, 2.49 (ABq,  $J$  = 15.3 Hz, 1H each), 2.10 (s, 3H);  $^{13}\text{C}$  NMR ( $\text{CDCl}_3$ , 75 MHz)  $\delta$  154.1, 152.3, 151.2, 148.7, 147.0, 130.7, 130.4, 130.0, 129.7, 129.5, 129.4, 128.0, 127.1, 124.4, 124.3, 124.1, 123.3, 123.0, 122.3, 121.2 (two peaks overlapped), 120.2, 119.4, 117.8, 117.0, 116.5, 116.4, 102.2, 74.5, 70.2, 46.6, 17.9; IR  $\nu$  (KBr) 3383, 1483, 1449, 1227, 754  $\text{cm}^{-1}$ ; HRMS (EI) calcd for  $\text{C}_{32}\text{H}_{24}\text{O}_4$  [ $\text{M}^+$ ] 472.1675, found 472.1677.

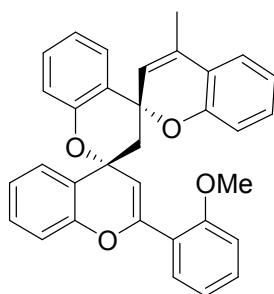

### Preparation of compound 3.

To a solution of **1** (200 mg, 0.4 mmol) in methylene chloride (15 mL) was added an ethereal solution of diazomethane (prepared from the Diazald kit) at 0 °C. After the reaction was stirred for 1 h, the solvent was removed by evaporation. The crude product was purified by column chromatography (1:22 EtOAc/hexanes) to give a white solid; yield 65%;  $R_f$  = 0.65 (10% EtOAc/hexanes); mp 198–199 °C;  $^1\text{H}$  NMR ( $\text{CDCl}_3$ , 300 MHz)  $\delta$  7.80 (dd,  $J$  = 7.8, 1.5 Hz, 1H), 7.72 (dd,  $J$  = 7.8, 1.8 Hz, 1H), 7.53 (td,  $J$  = 9.8, 1.8 Hz, 1H), 7.31–7.06 (m, 7H), 6.98 (dd,  $J$  = 7.8, 0.9 Hz, 1H), 6.94–6.80 (m, 4H), 6.77 (dd,  $J$  = 8.1, 0.9 Hz, 1H), 6.54 (s, 1H), 6.31 (s, 1H), 3.70 (s,

3H), 2.63, 2.40 (ABq,  $J = 14.1$  Hz, 1H each), 1.89 (s, 3H);  $^{13}\text{C}$  NMR ( $\text{CDCl}_3$ , 75 MHz)  $\delta$  157.2, 154.3, 153.4, 151.5, 146.1, 129.8 (three peaks overlapped), 129.4, 128.9, 127.9, 127.1, 126.5, 124.5, 124.1, 123.9, 122.6, 121.8, 121.5, 121.1, 120.6, 120.3, 117.7, 117.4, 116.9, 115.8, 111.1, 105.1, 75.5, 71.1, 55.0, 39.4, 25.3.; IR  $\nu$  (KBr) 1637, 1483, 1455, 1295, 1232, 748  $\text{cm}^{-1}$ ; HRMS (EI) calcd for  $\text{C}_{33}\text{H}_{26}\text{O}_4$  [ $\text{M}^+$ ] 486.1831, found 486.1828.

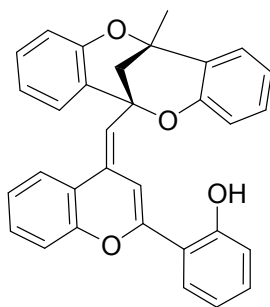

#### Isolation of compound 6.

To a solution of **1** (50 mg, 0.1 mmol) in chloroform was heated to 40 °C for 8 h. After cooled down to room temperature, the solvent was evaporated under the reduced pressure and the crude product was purified by column chromatography (1:20 EtOAc/hexanes) to give a white solid; yield 75%;  $R_f = 0.38$  (15% EtOAc/hexanes); mp 183–184 °C;  $^1\text{H}$  NMR ( $\text{CDCl}_3$ , 300 MHz)  $\delta$  7.80 (dd,  $J = 8.1, 1.5$  Hz, 1H), 7.52 (dd,  $J = 7.8, 1.5$  Hz, 1H), 7.35–7.10 (m, 6H), 6.98 (td,  $J = 7.8, 1.5$  Hz, 1H), 6.92–6.81 (m, 7H), 6.60 (s, 1H), 6.30 (s, 1H), 6.13 (s, 1H), 2.41 (s, 2H), 1.87 (s, 3H);  $^{13}\text{C}$  NMR ( $\text{CDCl}_3$ , 75 MHz)  $\delta$  154.2, 154.1, 153.2, 150.5, 148.7, 130.9, 130.1, 129.8, 129.4, 129.3, 127.8, 126.6, 125.9, 124.8, 124.3, 123.8, 122.9, 121.3, 121.1, 120.8, 120.5, 119.2, 117.5, 117.3 (two peaks overlapped), 117.2, 116.7, 103.2, 75.4, 71.1, 40.1, 25.1; IR  $\nu$  (KBr) 3383, 3338, 1456, 1455, 1238, 748  $\text{cm}^{-1}$ ; HRMS (EI) calcd for  $\text{C}_{32}\text{H}_{24}\text{O}_4$  [ $\text{M}^+$ ] 472.1675, found 472.1678.

### The UV–vis absorption spectra of **1**.

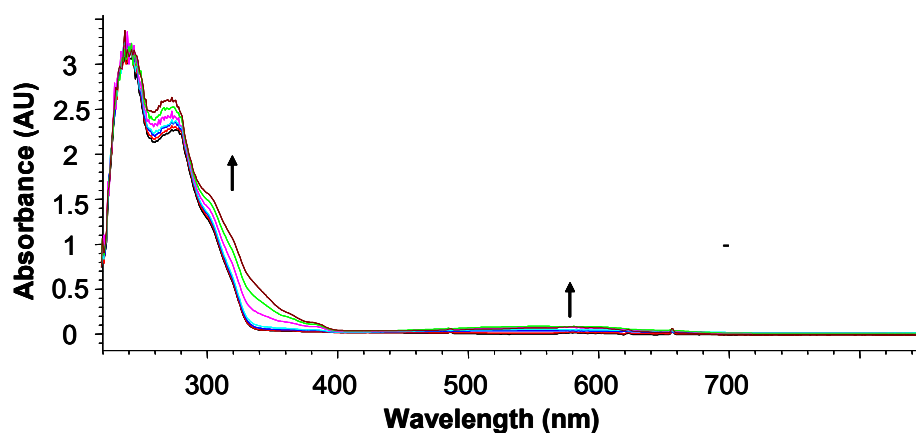

**Figure S1.** The absorption spectra of **1** ( $1.9 \times 10^{-5}$  M in  $\text{CHCl}_3$ ) obtained under temperature between  $-20$  to  $50$   $^{\circ}\text{C}$ .

### X-ray crystallography

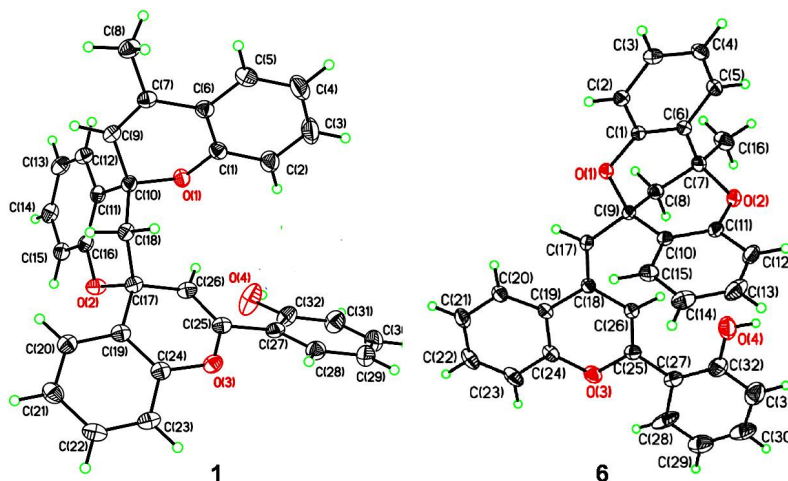

**Figure S2.** X-ray crystal structures of compounds **1** and **6**.

### Variable temperature $^1\text{H}$ NMR experiments of **1**

Figure S3 shows the partial proton NMR spectra of **1** in  $\text{CDCl}_3$  obtained under temperature between  $20$  to  $55$   $^{\circ}\text{C}$ . The emergence of three discernible new singlets at 6.29, 5.21, and 4.78 ppm were tentatively assigned to the three olefin hydrogen absorptions of **8**. The new singlet at 5.79 ppm could be the hydroxy hydrogen absorption.

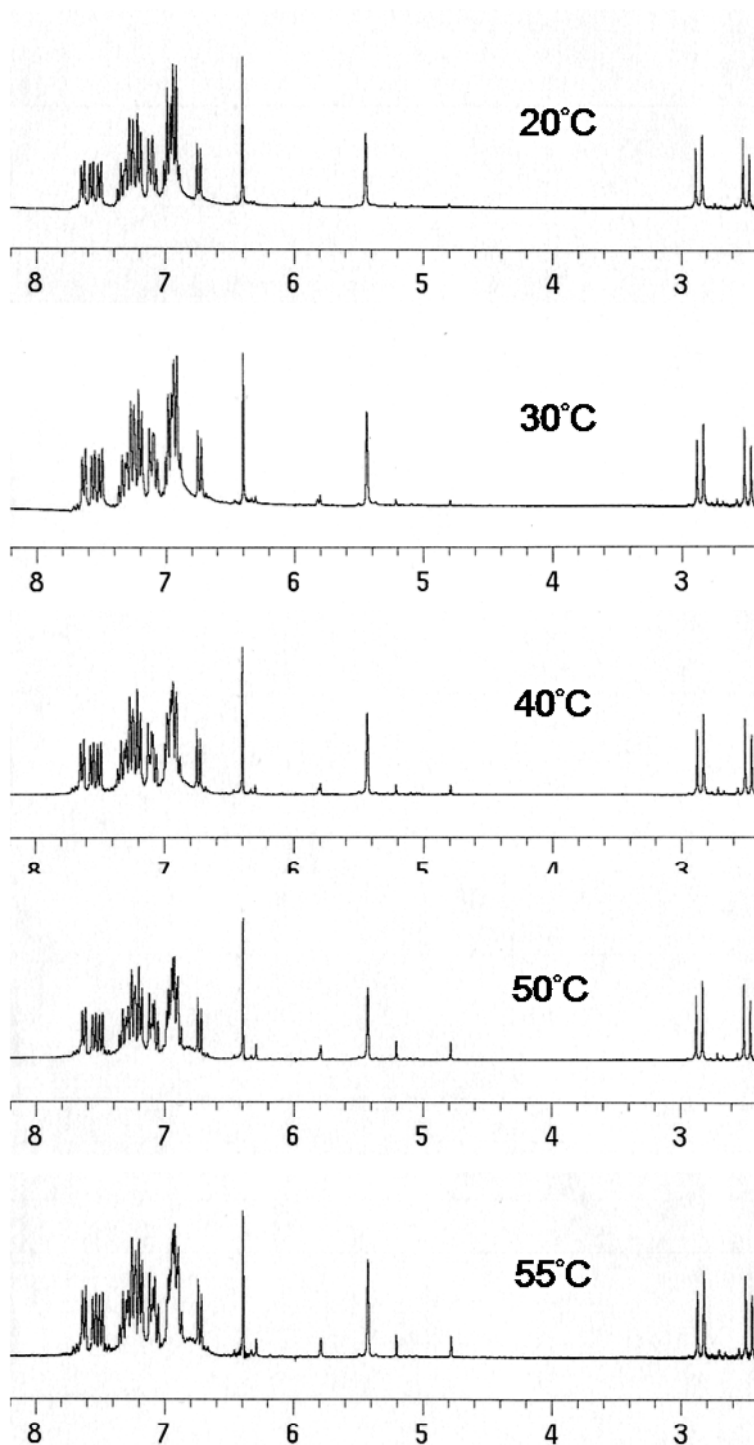

**Figure S3.** The partial proton NMR spectra of **1** in CDCl<sub>3</sub> obtained under temperature between 20 to 55 °C.

#### Reference

1. Dorofeenko, G. N.;Tkachenko, V. V. *J. Heterocycl. Chem.* **1974**, *10*, 154–157.

dyyj161

exp2 stdih

SAMPLE DEC. 15 2008  
date Dec 15 2008  
solvent CD3OD  
file exp  
ACQUISITION  
sfrq 300.067  
in H1  
at 3.413  
np 32768  
sw 4800.6  
fb 2600  
bs 4  
tpwr 57  
pw 6.2  
dl 0  
tof 723.5  
nt 64  
cl 64  
alock n  
gain not used  
flags n  
11 in n  
dp y  
hs nm  
DISPLAY  
sp -601.3  
wp 4800.8  
vs 182  
sc 0  
wc 250  
hzmm 19.20  
ls 500.00  
rfi 1531.6  
rfp 990.2  
th 2  
ins nm  
cdc ph 100.000

DEC. 15 2008  
dfrq 300.066  
dn H1  
dpr 30  
dof 0  
dm nm  
dmm c  
dmf 200  
dseq 1.0  
dres n  
homo  
PROCESSING  
lb 0.10  
wfllt  
proc ft  
fn 65536  
math f

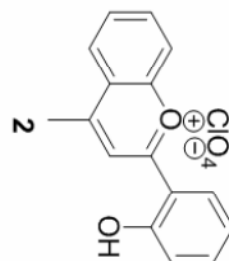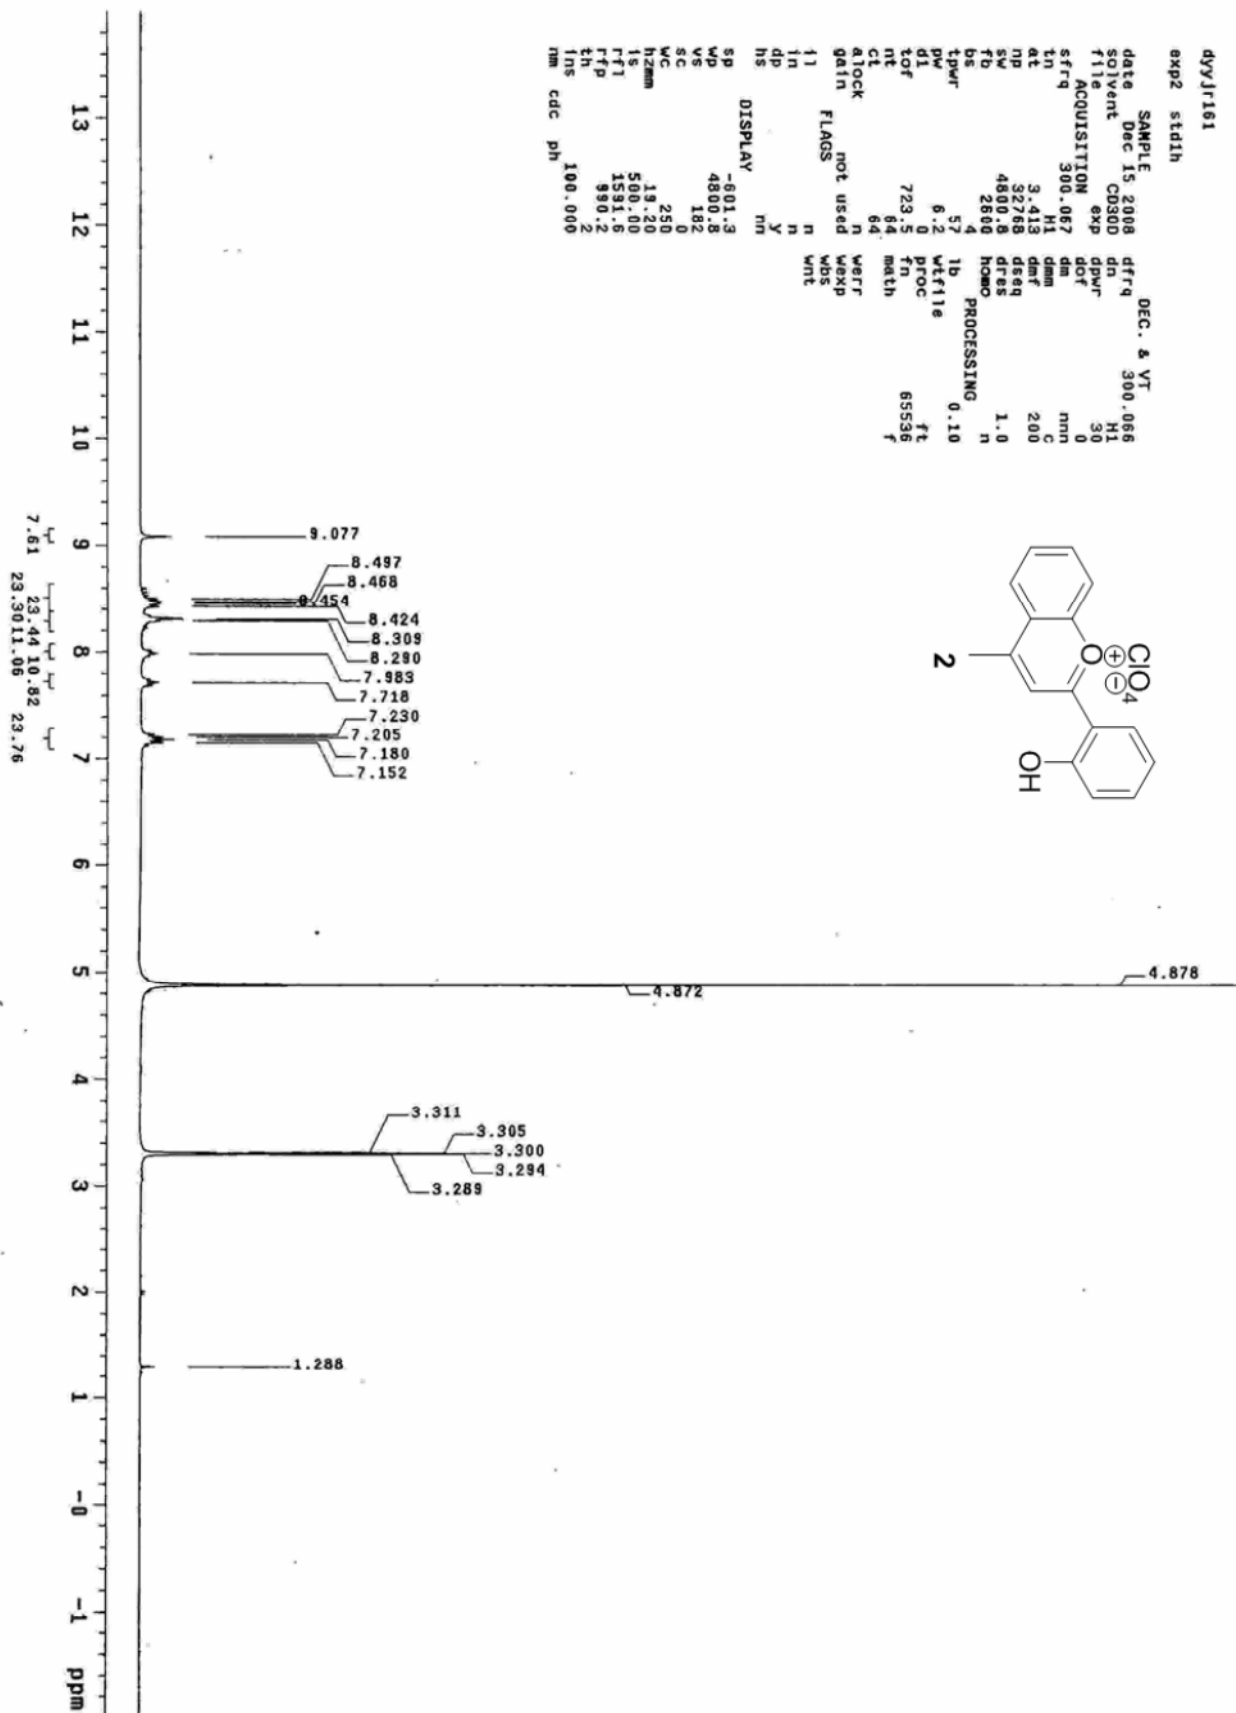

dyjfr136

expi stdh

|             |            |            |         |
|-------------|------------|------------|---------|
| SAMPLE      |            | DEC. 8 VT  |         |
| date        | Aug 8 2008 | dfreq      | 300.065 |
| solvent     | CDCl3      | dn         | H1      |
| file        | exp        | dpwr       | 30      |
| ACQUISITION |            |            |         |
| dfreq       | 300.066    | da         | nm      |
| tn          | H1         | dc         | nm      |
| at          | 3.413      | daf        | C       |
| np          | 32768      | dseq       | 200     |
| sw          | 4800.8     | dres       | 1.0     |
| fb          | 2600       | homo       | n       |
| bs          | 4          | PROCESSING |         |
| tpwr        | 55         | lb         | 0.10    |
| pw          | 6.2        | wtfile     | ft      |
| di          | 0          | proc       | 65536   |
| to          | 723.5      | fn         | f       |
| nt          | 32         | math       |         |
| ct          | 32         |            |         |
| atlock      | n          | werr       |         |
| gain        | not used   | wexp       |         |
| flags       | n          | wds        |         |
| l1          | n          | wnt        |         |
| in          | y          |            |         |
| dp          | y          |            |         |
| hs          | nm         |            |         |
| DISPLAY     |            |            |         |
| sp          | -602.6     |            |         |
| wp          | 4800.8     |            |         |
| vc          | 20         |            |         |
| sc          | 0          |            |         |
| vc          | 250        |            |         |
| h2nm        | 13.240     |            |         |
| ic          | 127.460    |            |         |
| rfl         | 602.6      |            |         |
| rffp        | 4          |            |         |
| th          | 4          |            |         |
| ins         | nm         |            |         |
| cdc         | ph         |            |         |
|             | 100.000    |            |         |

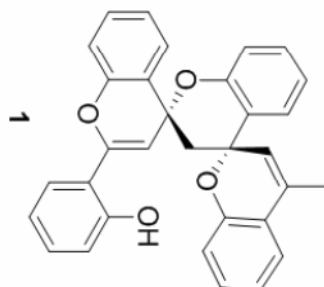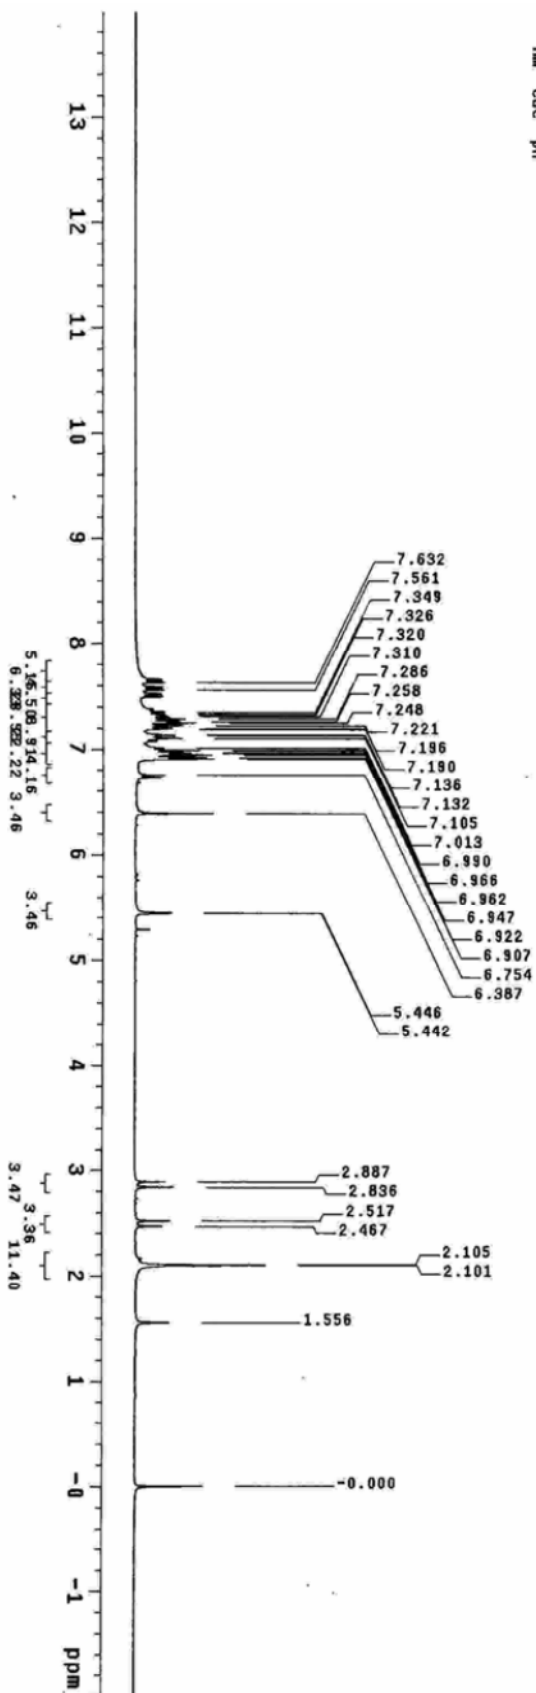

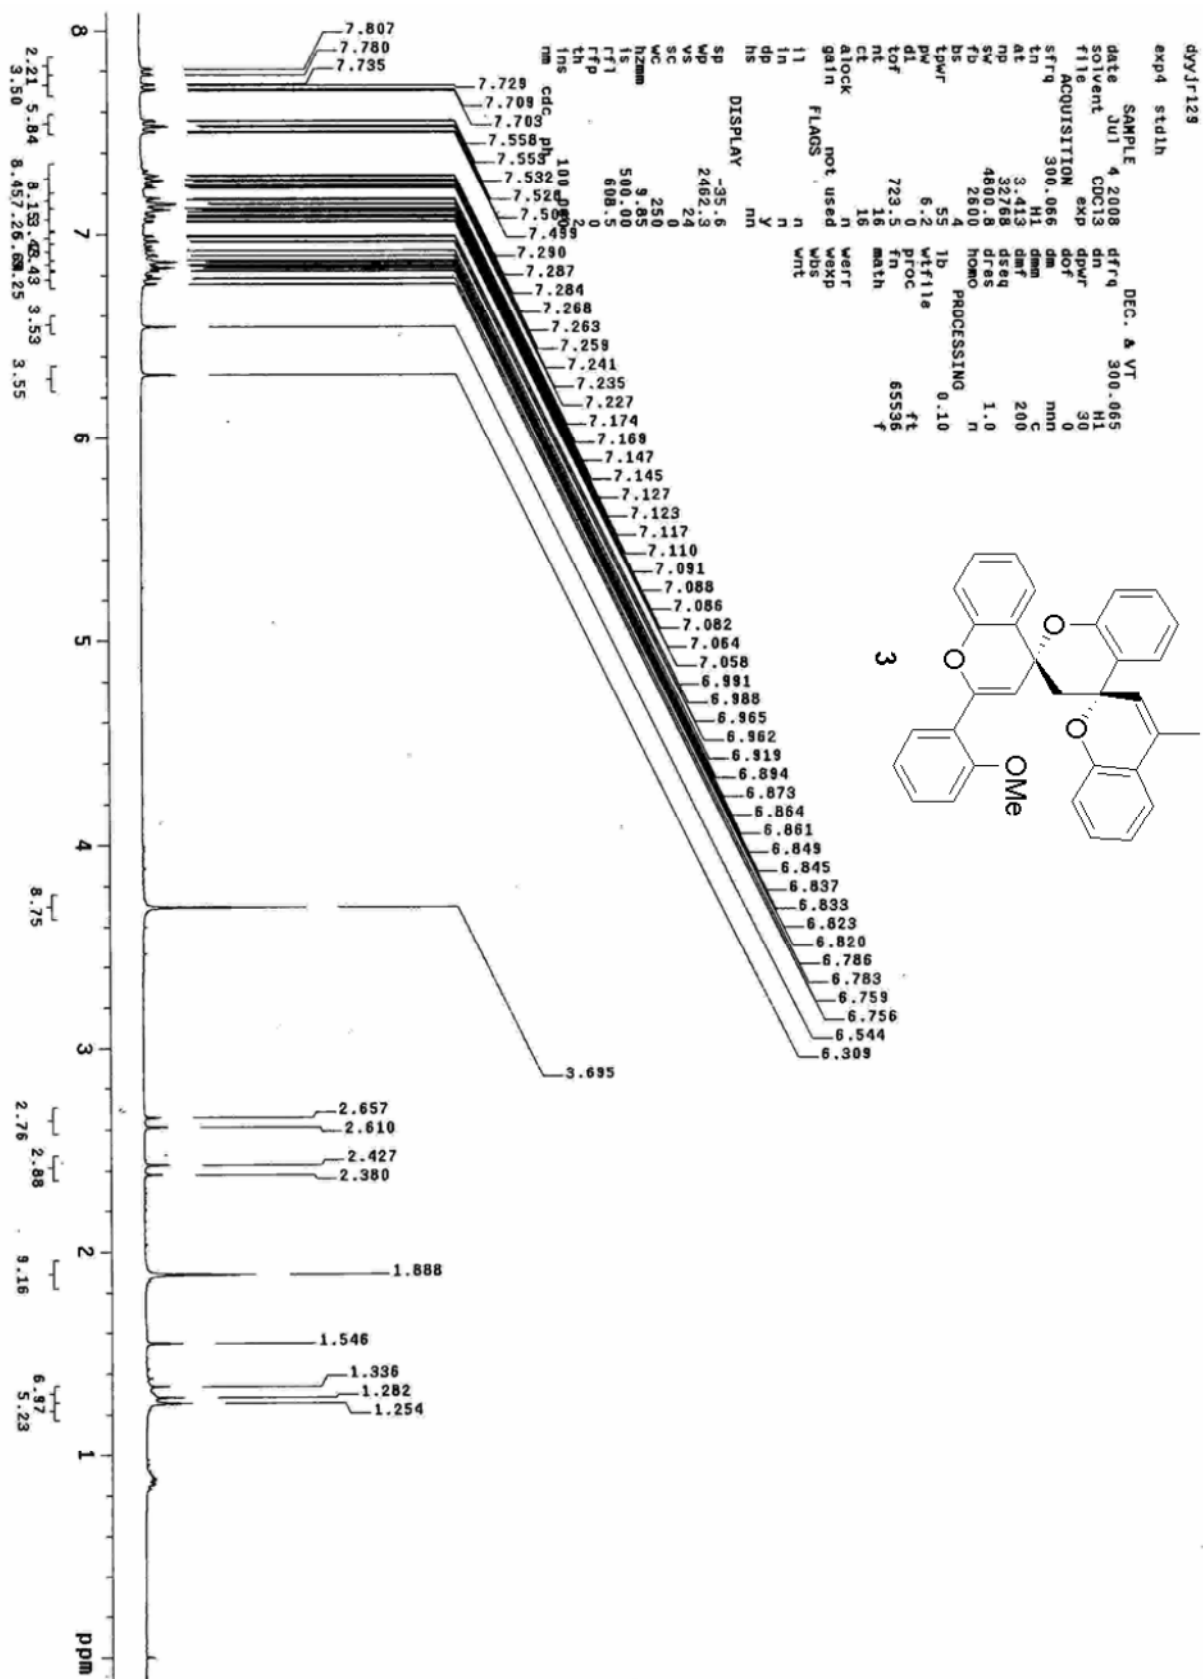

dyyj121

expi stdln

SAMPLE  
date May 16 2008  
solvent CDC13  
file  
ACQUISITION  
exp  
sfrq 300.066  
in H1  
at 3.413  
np 32768  
sw 4800.8  
fb 2600  
bs 4  
tqwr 55  
pw 6.2  
dl 0  
to 723.5  
nt 16  
ct 16  
atlock n  
gain not used  
FLAGS  
11 n  
in n  
dp y  
hs nm  
DISPLAY  
sp -601.9  
wp 4800.8  
vs 12  
sc 0  
mc 250  
hzm 19.20  
is 500.00  
rfi 601.9  
th 0  
ins 1  
nm 100.000  
cdc ph

DEC. & VT  
300.065  
H1  
30  
0  
0  
mm  
C  
200  
1.0  
n  
PROCESSING  
0.10  
1b  
wtfile  
proc  
f  
65536  
f

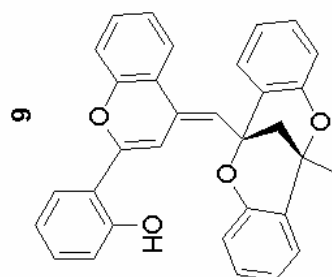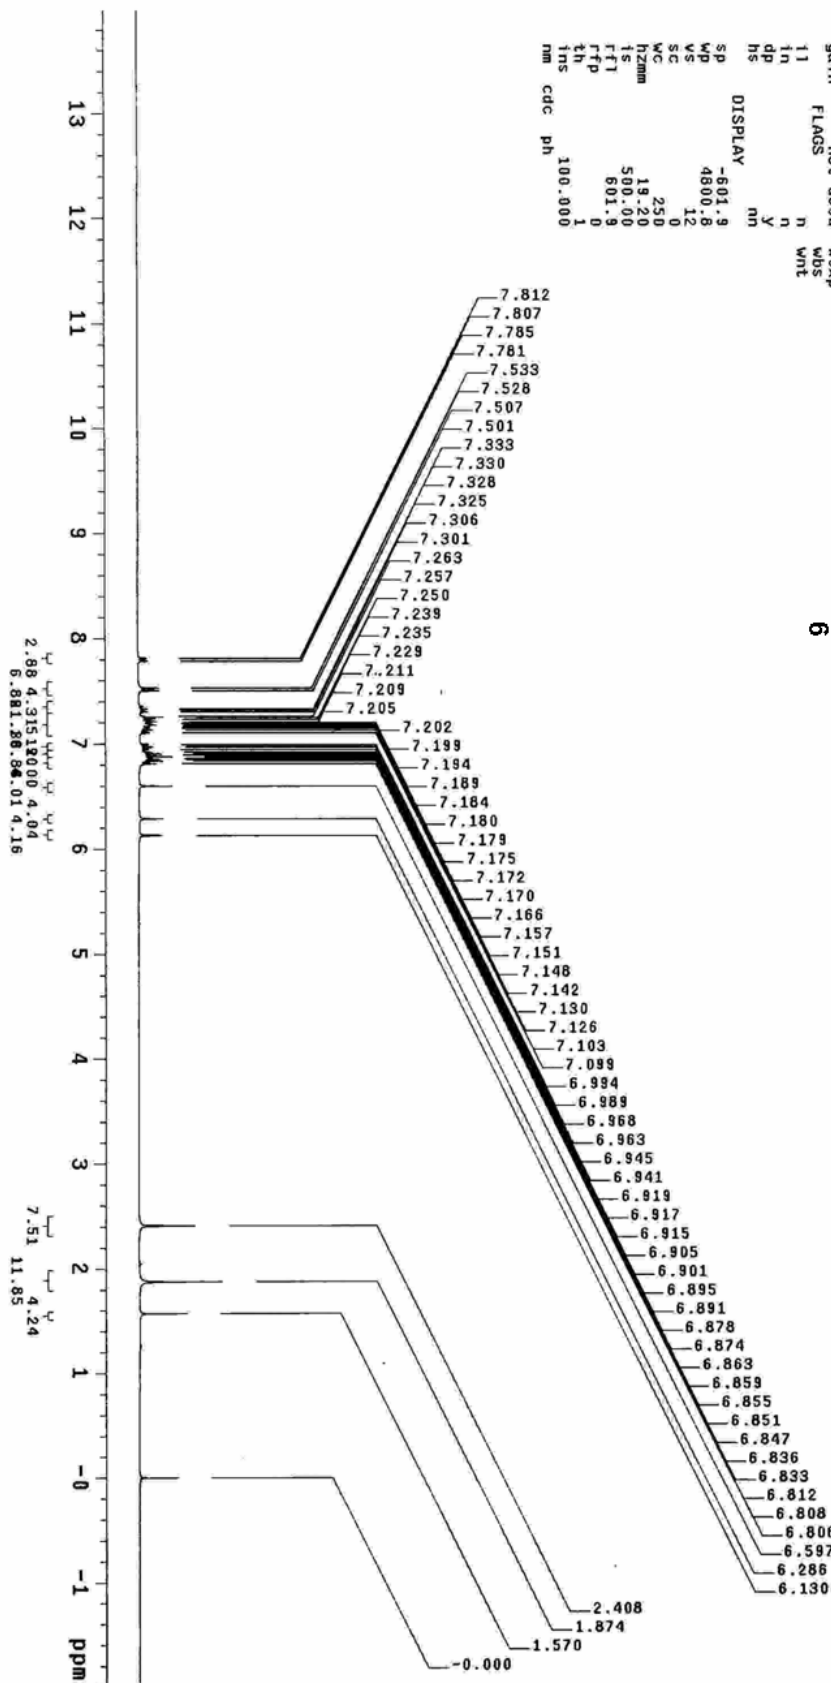

Oc1ccccc1C2=CC=C3C=C(C=C2)OC4=CC=CC=C4[C@H]5C=C(C=C[C@H]6C=C(C=C[C@@H]7C=CC(=C5)O7)O6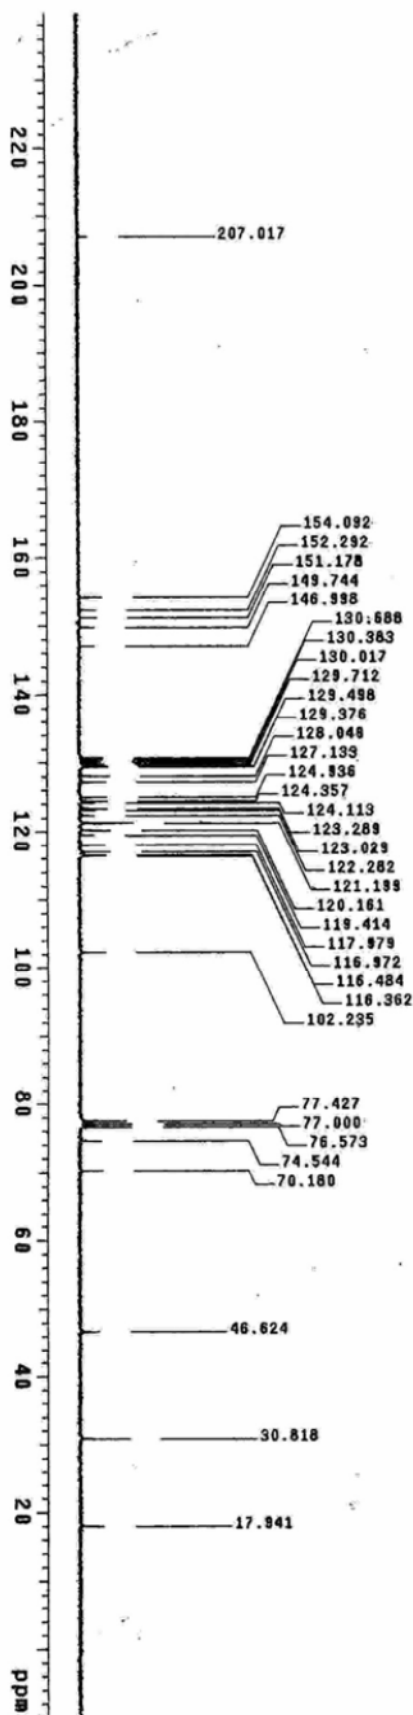

exp2 st013c

SAMPLE DEC. 8 VT  
 date Jan 15 2009 dfrq 300.065  
 solvent CDCl3 dn H1  
 file C0013 exp 41  
 ACQUISITION  
 sfrq 75.460 dm 0  
 tn C13 dnm yyy  
 at 0.869 dmf 6708  
 mp 32768 dseq  
 sw 18858.0 dres 1.0  
 fb 10400 homo  
 bs 16  
 tpr 55  
 pw 4.8 lb  
 d1 2.000 wtfle 1.00  
 tot 1220.8 proc ft  
 nt 15384 math not used f  
 ct 15384  
 atock n  
 gain not used  
 flags not used  
 il n  
 in y  
 dp y  
 hs nm

DISPLAY -728.2  
 sp 18858.0  
 wd 45  
 vs 0  
 sc 250  
 wc 40.65  
 hzma 500.90  
 ls 5087.9  
 rfi 5809.7  
 th 13  
 ins 100.000  
 nm no ph

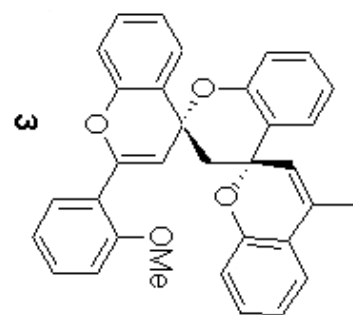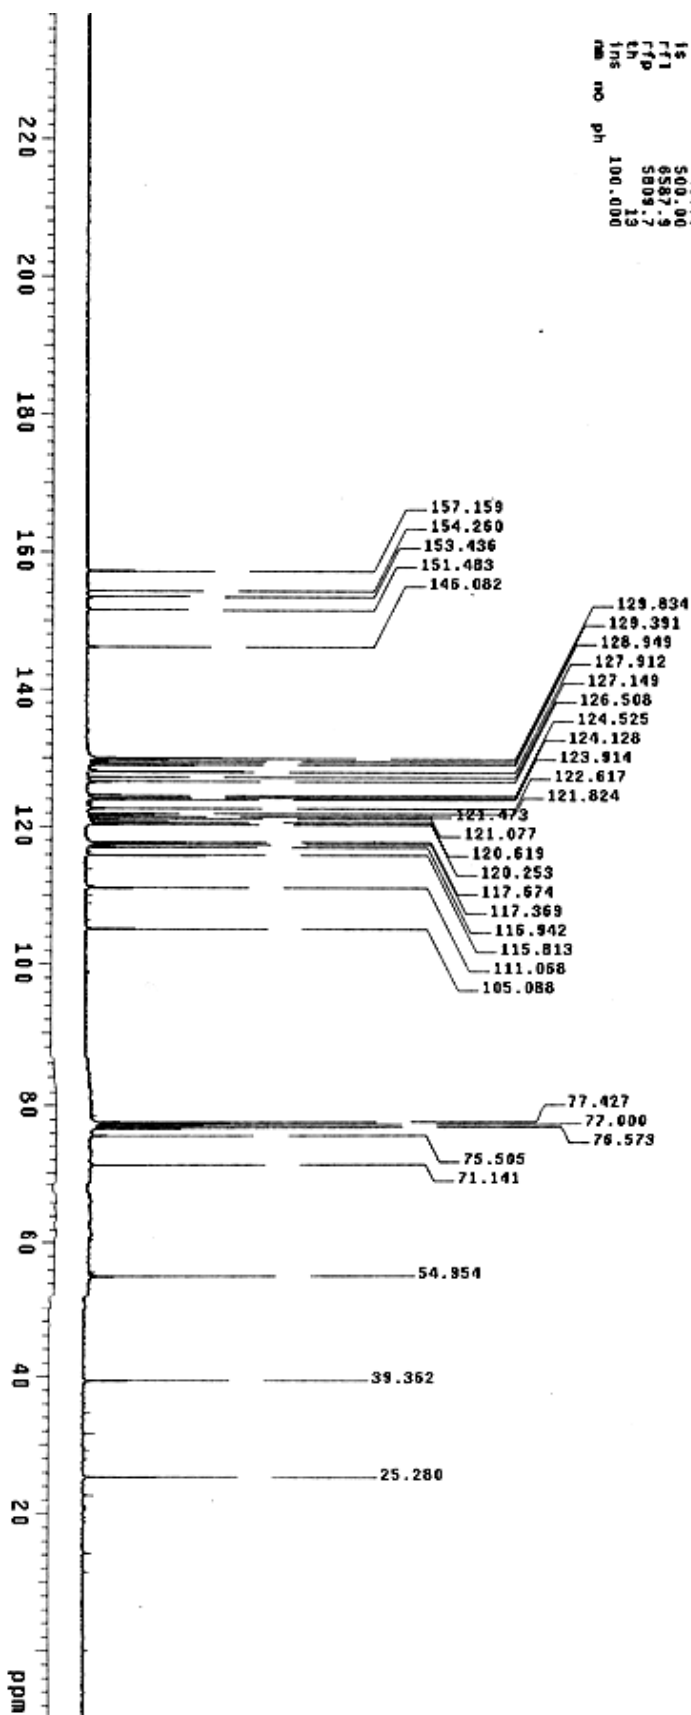

DYVJRI171

exp2 std13c

|             |             |            |          |
|-------------|-------------|------------|----------|
| SAMPLE      |             | DEC. & VT  |          |
| date        | Jan 20 2009 | dfrq       | 300.065  |
| solvent     | CDCl3       | dn         | H1       |
| file        | exp         | dpr        | 41       |
| ACQUISITION |             | dof        | 0        |
| sfrq        | 75.460      | dm         | yyy      |
| in          | C13         | dmm        | w        |
| at          | 0.563       | dmt        | 6708     |
| np          | 32768       | dseg       |          |
| sw          | 18853.0     | dres       | 1.0      |
| fb          | 10400       | homo       | n        |
| bs          | 16          | PROCESSING |          |
| tpwr        | 55          | lb         | 1.00     |
| pv          | 4.8         | wtfile     |          |
| d1          | 2.000       | proc       | ft       |
| tof         | 1220.8      | fn         | not used |
| nt          | 2048        | math       | f        |
| ct          | 2048        |            |          |
| alock       | n           | werf       | not used |
| gain        | not used    | wexp       |          |
| flags       | n           | wbs        |          |
| il          | n           | wnt        |          |
| in          | n           |            |          |
| dp          | y           |            |          |
| hs          | mn          |            |          |
| DISPLAY     |             |            |          |
| sp          | -779.3      |            |          |
| wp          | 18853.0     |            |          |
| vs          | 24          |            |          |
| sc          | 0           |            |          |
| vc          | 250         |            |          |
| h2mm        | 75.44       |            |          |
| ls          | 500.00      |            |          |
| rfl         | 6589.1      |            |          |
| rtp         | 5809.7      |            |          |
| th          | 3           |            |          |
| ins         | 100.000     |            |          |
| nm          | no          |            |          |
| ph          |             |            |          |

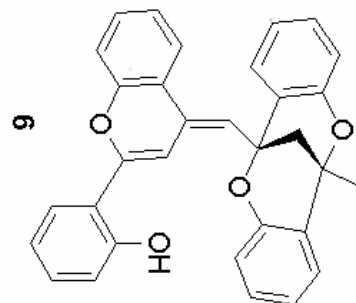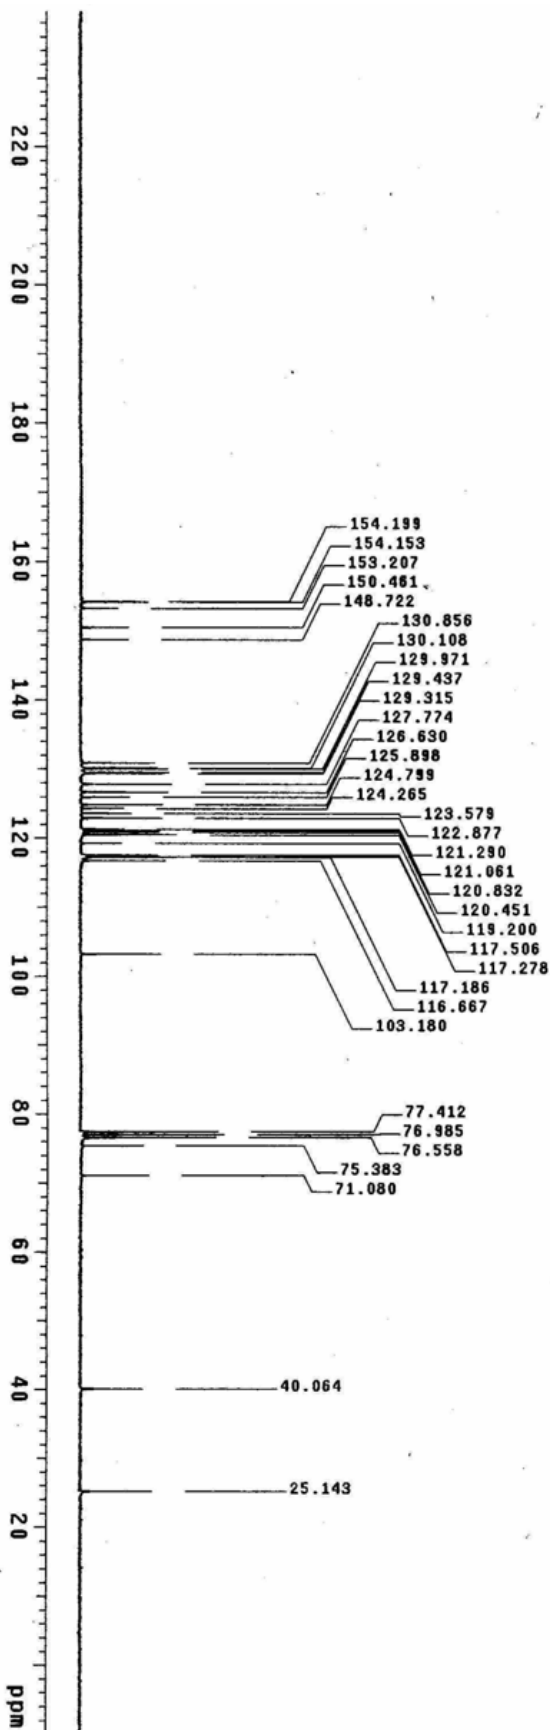

Supplement: Supplementary file 1 [file 4561414]
